# Supplementary material
Source: PubMed Central journal article supplement (PMC6613562)

# Supplemental Figures

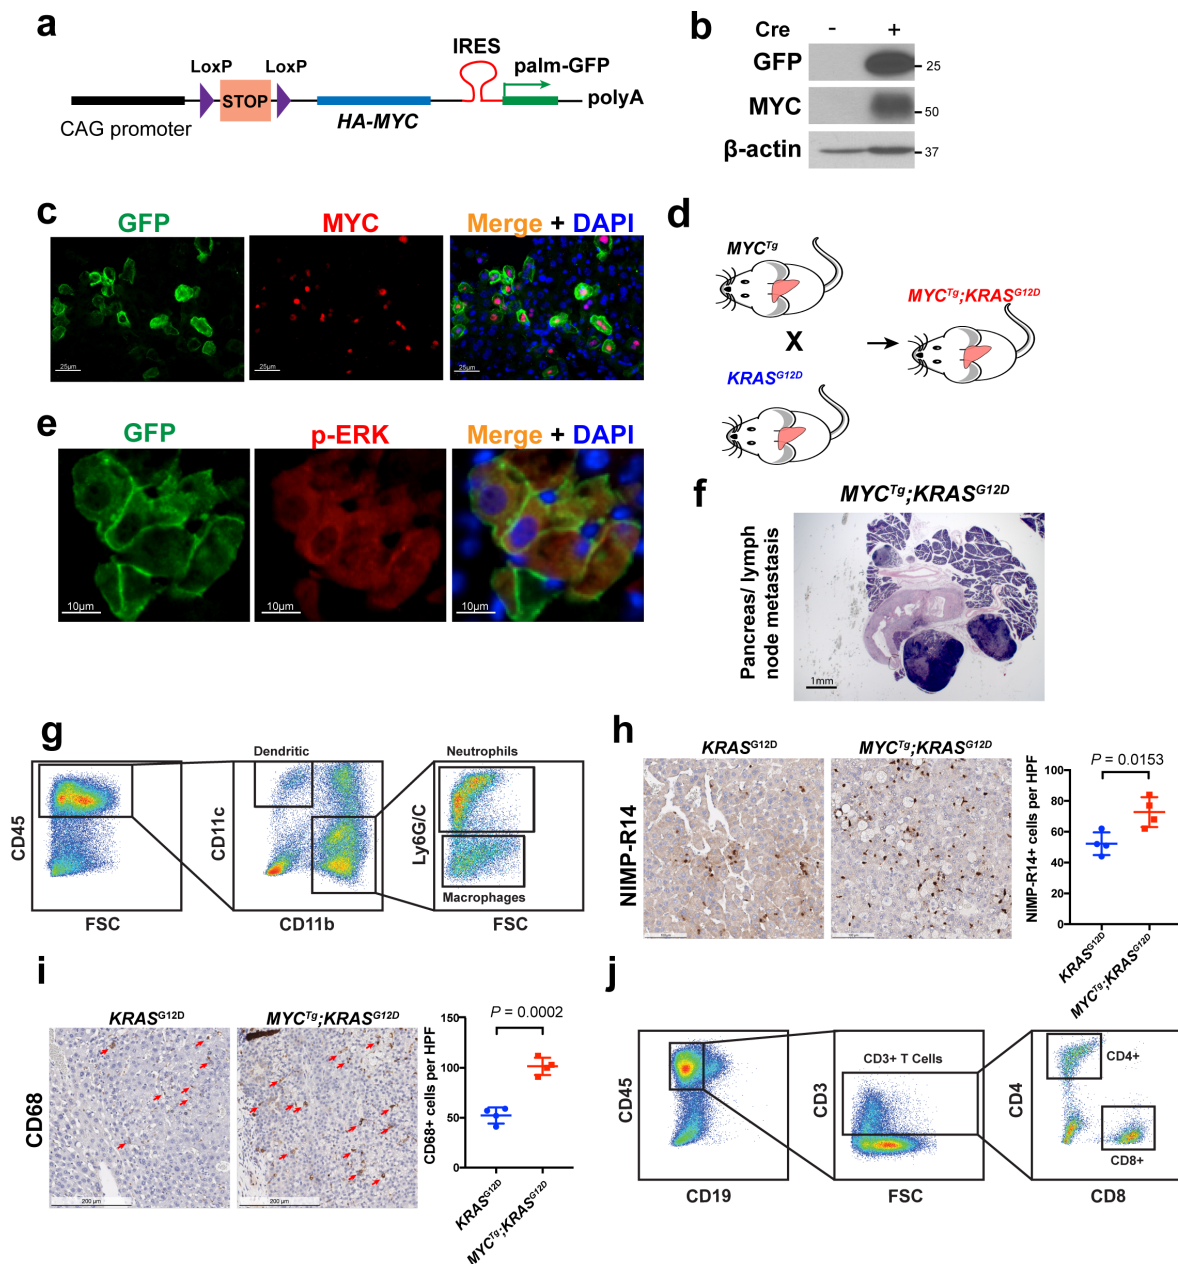

## Supplementary Figure 1 Generation and characterization of *Alb Cre; KRAS<sup>G12D</sup>* and *MYC<sup>Tg</sup>; KRAS<sup>G12D</sup>* mice.

(a) Construct for inducible expression of *MYC* transgene.

(b) GFP and MYC protein expression in the liver of Adenoviral-Cre infected *MYC<sup>Tg</sup>* mice (via tail vein) were assessed by western blot.

(c) GFP and MYC protein expression in the liver of Adenoviral-Cre infected *MYC<sup>Tg</sup>* mice were assessed by immunofluorescence.

(d) *Alb Cre; MYC<sup>Tg</sup>; KRAS<sup>G12D</sup>* mice were generated by intercrossing *MYC<sup>Tg</sup>* mice with *KRAS<sup>G12D</sup>* mice, followed by crossing with *Alb Cre* mice.

(e) Co-expression of GFP (indication of MYC expression) and p-ERK (indication of the activation of RTK/RAS signaling) were detected by immunofluorescence in *Alb Cre; MYC<sup>Tg</sup>; KRAS<sup>G12D</sup>* mice liver tissue. Representative figure from n=3 independent experiments is shown.

(f) Representative *MYC<sup>Tg</sup>; KRAS<sup>G12D</sup>* mice histology (n=4) of lymph node metastasis.

(g) Flow cytometry graph showing the strategy for distinguishing dendritic cells, neutrophils and macrophages.

(h) Representative and quantitative immunohistochemical analysis of NIMP-R14 (neutrophil marker) in *KRAS<sup>G12D</sup>* (n=4 animals) and *MYC<sup>Tg</sup>; KRAS<sup>G12D</sup>* (n=4 animals) mice liver tumors. Two-sided *t*-test.

(i) Representative and quantitative immunohistochemical analysis of CD68 (macrophage marker) in *KRAS<sup>G12D</sup>* (n=4 animals) and *MYC<sup>Tg</sup>; KRAS<sup>G12D</sup>* (n=4 animals) mice liver tumors. Red arrows represent CD68+ cells. Two-sided *t*-test.

(j) Flow cytometry graph showing the strategy for distinguishing CD4+ and CD8+ T lymphocytes.

All values represent the mean  $\pm$  SD. Uncropped blots are provided in Supplementary Figure 15.

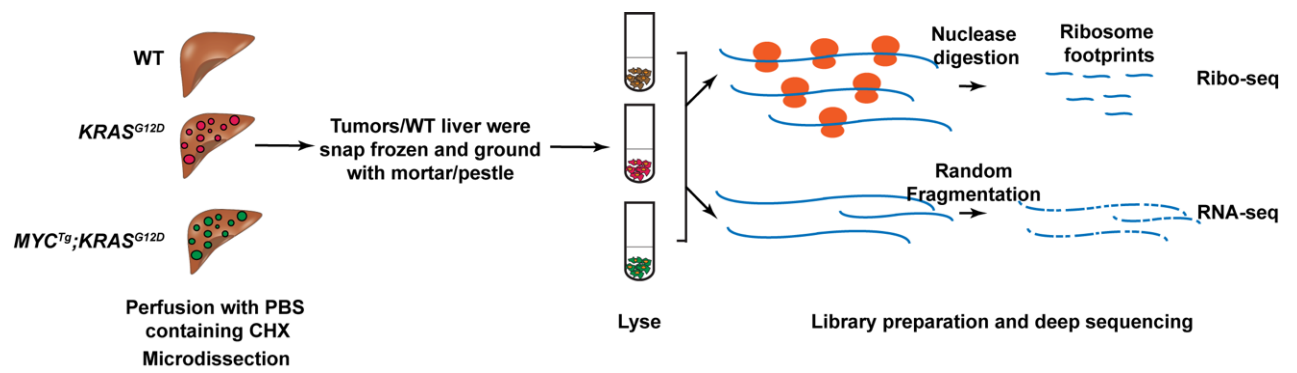

**Supplementary Figure 2 Identifying the gene expression landscapes in WT liver,  $KRAS^{G12D}$  and  $MYC^{Tg};KRAS^{G12D}$  mice liver tumors using ribosome profiling.**

Schematics of ribosome profiling strategy in WT liver (n=3),  $KRAS^{G12D}$  (n=2) and  $MYC^{Tg};KRAS^{G12D}$  mice liver tumors (n=2).

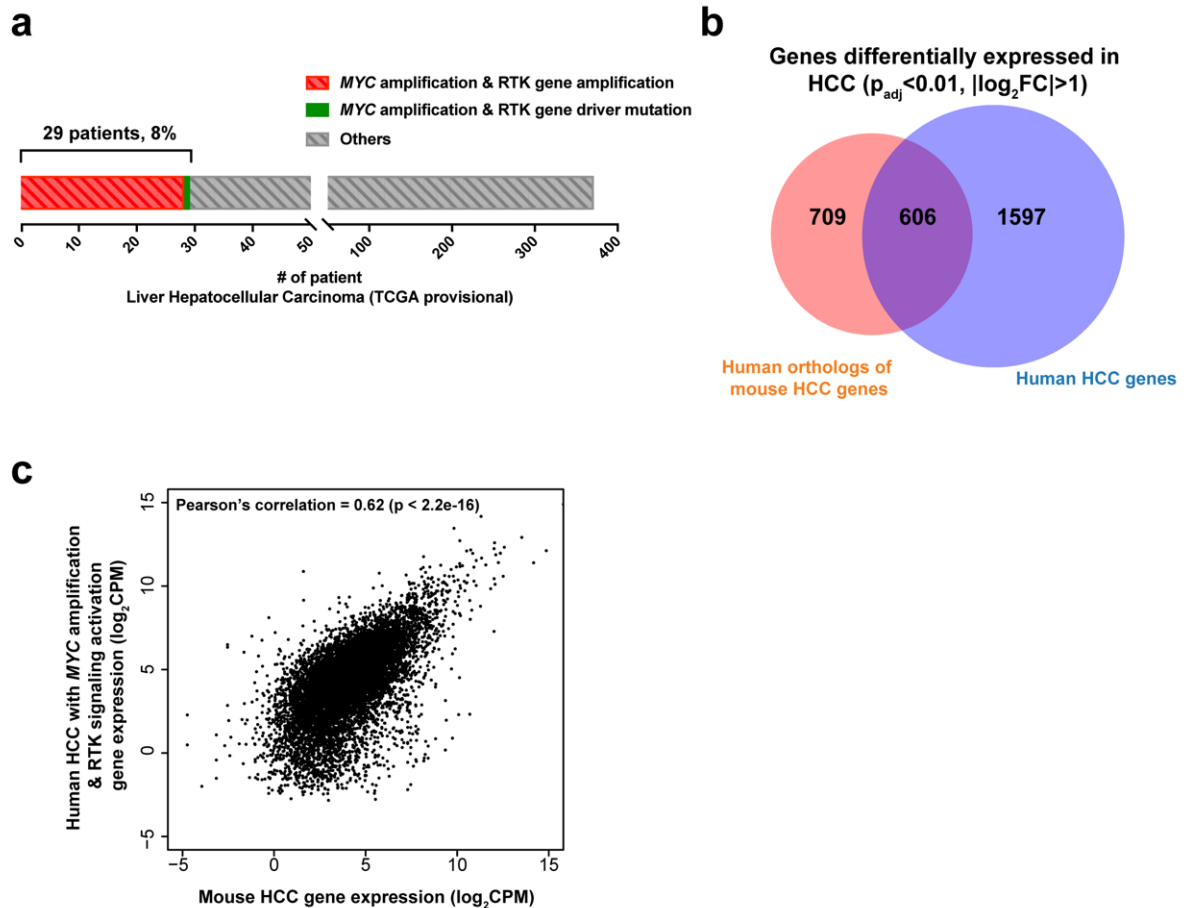

**Supplementary Figure 3 The HCCs in  $MYC^{Tg};KRAS^{G12D}$  mice exhibit global transcriptional similarities to human HCCs.**

(a) Graph showing 29 (out of 370) human HCC patients (8%) from the TCGA provisional liver hepatocellular carcinoma dataset harbor MYC amplification together with potential RTK signaling activation. Potential RTK signaling activation includes RTK gene copy-number amplification as well as RTK gene driver mutation with known oncogenic function.

(b) Venn diagram showing overlap of genes differentially expressed in hepatocellular carcinoma in  $n=29$  human patients and  $n=2$   $MYC^{Tg}; KRAS^{G12D}$  mouse ( $P = 1.07 \times 10^{-101}$ , hypergeometric test), 95% confidence interval is 0.44–0.49. Differential gene expression comparing HCC to normal liver tissue samples were defined as  $P_{adj} < 0.01$  and  $|\log_2FC| > 1$ .

(c) Comparison of gene expression levels between orthologous genes in human patients that have MYC amplification and RTK signaling activation and the  $MYC^{Tg}; KRAS^{G12D}$  mouse. The 95% confidence interval for the Pearson coefficients is 0.61–0.63 (Pearson's correlation test, two-sided  $P < 2.2 \times 10^{-16}$ ). Average normalized gene expression levels across all tumor samples ( $n=29$  for human and  $n=2$  for  $MYC^{Tg}; KRAS^{G12D}$  mouse) are shown in  $\log_2$ CPM (counts per million).

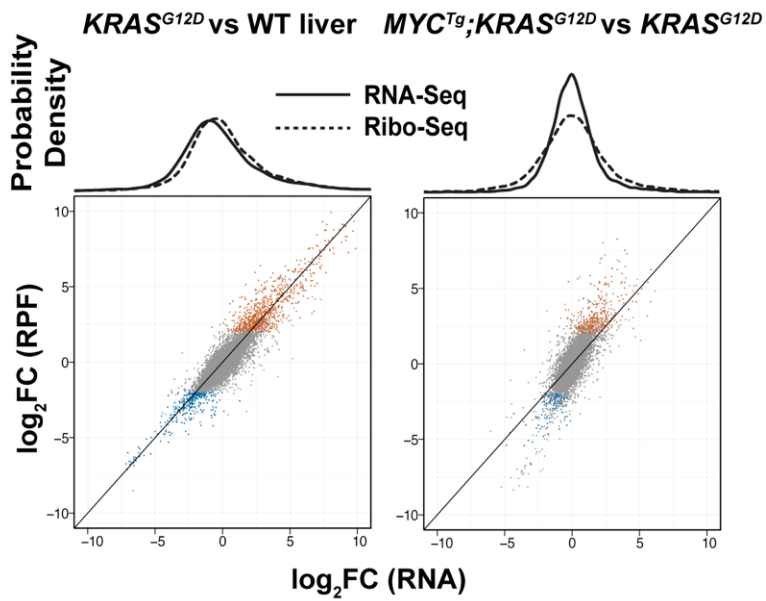

**Supplementary Figure 4 Distinct from KRAS alone, MYC and KRAS cooperation selectively alters gene expression at the translation level.**

Scatter plot showing the changes in Ribo-Seq (y-axis) compared to changes in RNA-Seq (x-axis), comparing  $KRAS^{G12D}$  (n=2) to WT (n=3) (left) and  $MYC^{Tg};KRAS^{G12D}$  (n=2) to  $KRAS^{G12D}$  (n=2) (right). Genes that are significantly up or down-regulated in Ribo-Seq ( $P_{adj} < 0.1$  and  $|\log_2FC| > 2$ ) are highlighted in orange and blue respectively. Comparison of the probability density distribution of  $\log_2FC$  in RNA-Seq (solid line) and Ribo-Seq (dashed line) reveals a greater alteration in the Ribo-Seq than RNA-Seq between  $MYC^{Tg};KRAS^{G12D}$  and  $KRAS^{G12D}$ .

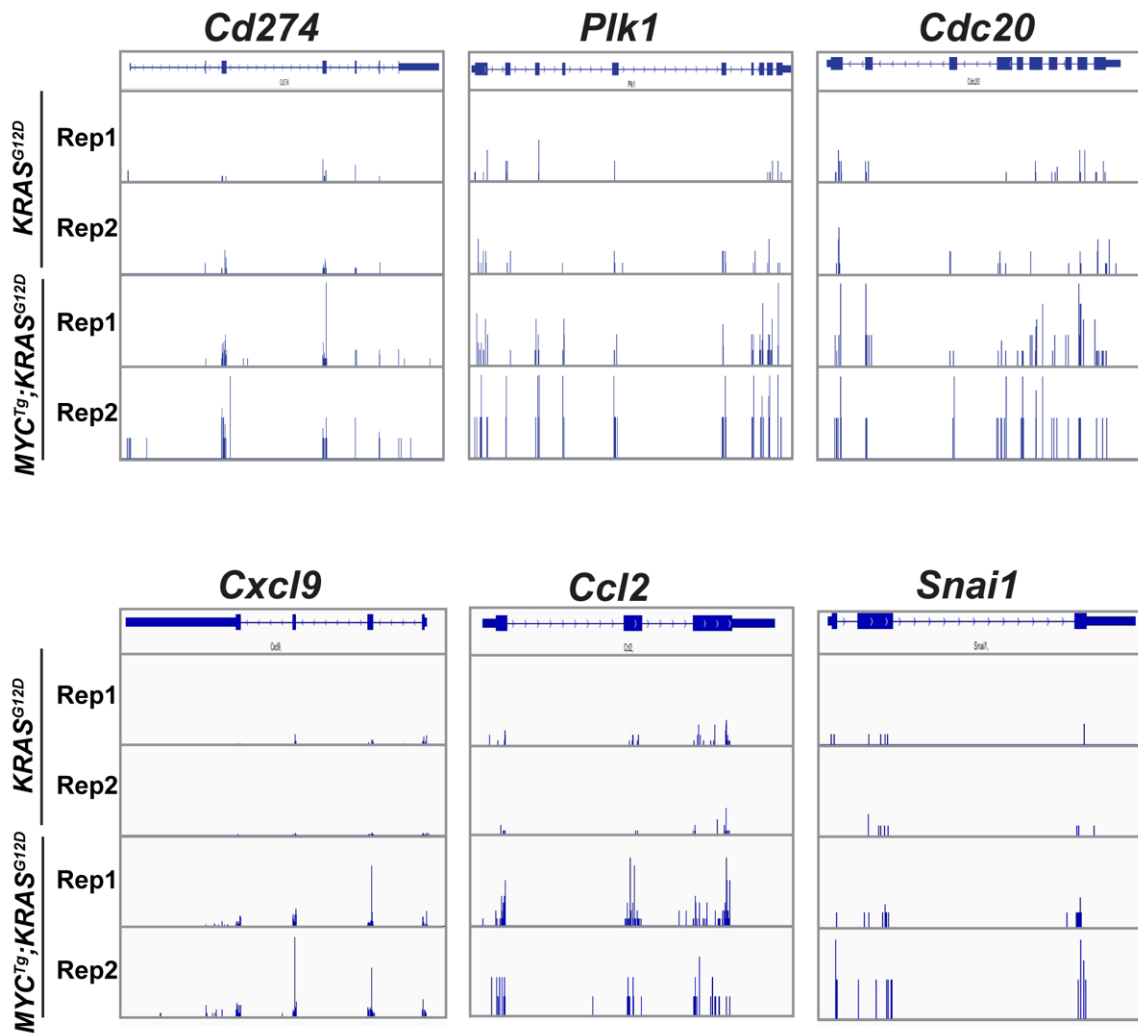

**Supplementary Figure 5 Ribosome profiling indicates that *MYC* upregulates the translation of *Cd274*, *Plk1*, *Cdc20*, *Cxcl9*, *Ccl2* and *Snai1* when cooperating with *KRAS<sup>G12D</sup>*.**

Ribo-Seq plots of *Cd274* (gene coding PD-L1 protein), *Plk1*, *Cdc20*, *Cxcl9*, *Ccl2* and *Snai1* in *KRAS<sup>G12D</sup>* (n=2) and *MYC<sup>Tg</sup>; KRAS<sup>G12D</sup>* (n=2) mice HCC are shown. Approximate 5-fold increase in the ribosome reads at *Cd274* mRNA is detected, in accordance to the IF result shown in Fig 2c.

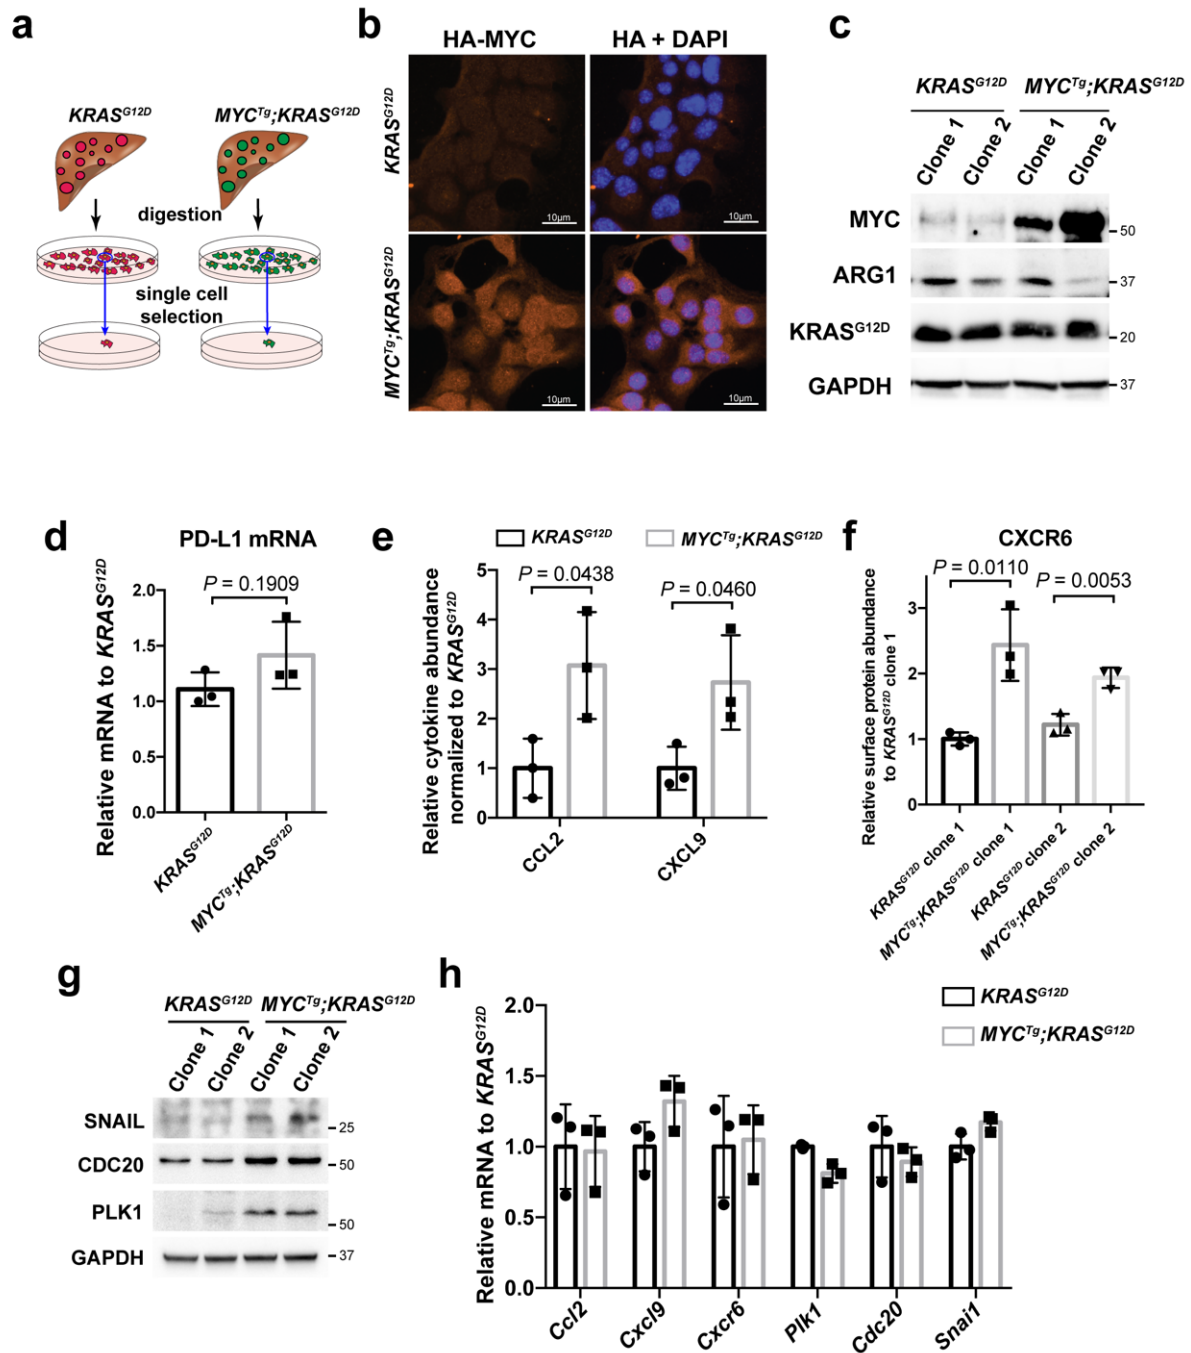

**Supplementary Figure 6 MYC, in cooperation with KRAS<sup>G12D</sup>, regulates genes expression at the protein levels instead of transcriptional levels in mouse HCC cells.**

(a) Schematic of the protocol for generating single clone mouse liver HCC cell lines from *KRAS<sup>G12D</sup>* and *MYC<sup>Tg</sup>;*KRAS<sup>G12D</sup>* liver tumors.*

(b) HA-MYC and DAPI were assessed by immunofluorescence in cell lines derived from tumors of *MYC<sup>Tg</sup>;*KRAS<sup>G12D</sup>* and *KRAS<sup>G12D</sup>* mice liver. Representative figure from n=3 independent experiments is shown.*

(c) MYC, ARG1, *KRAS<sup>G12D</sup>* and GAPDH proteins were assessed by western blot in single cloned cell lines derived from tumors of *MYC<sup>Tg</sup>;*KRAS<sup>G12D</sup>* and *KRAS<sup>G12D</sup>* mice liver. Representative figure from n=3 independent experiments is shown.*

(d) Relative mRNA expressions of PD-L1 in single cloned cell lines derived from tumors of *MYC<sup>Tg</sup>;KRAS<sup>G12D</sup>* and *KRAS<sup>G12D</sup>* mice liver were assessed by RT-qPCR. n=3 independent experiments is shown, two-sided *t*-test.

(e) Relative secreted CCL2 and CXCL9 abundance in *MYC<sup>Tg</sup>;KRAS<sup>G12D</sup>* and *KRAS<sup>G12D</sup>* HCC cells were assessed by flow cytometry. n=3 independent experiments is shown, two-sided *t*-test.

(f) Relative surface CXCR6 abundance in *MYC<sup>Tg</sup>;KRAS<sup>G12D</sup>* and *KRAS<sup>G12D</sup>* HCC cells were assessed by flow cytometry. n=3 independent experiments is shown, two-sided *t*-test.

(g) SNAIL, CDC20, PLK1 and GAPDH protein abundance were assessed by western blot in *MYC<sup>Tg</sup>;KRAS<sup>G12D</sup>* and *KRAS<sup>G12D</sup>* HCC cells. Representative figure from n=3 independent experiments is shown.

(h) Relative mRNA expressions of *Ccl2*, *Cxcl9*, *Cxcr6*, *Plk1*, *Cdc20* and *Snai1* were assessed by RT-qPCR. n=3 independent experiments is shown, two-sided *t*-test.

All values represent the mean  $\pm$  SD. Uncropped blots are provided in Supplementary Figure 15.



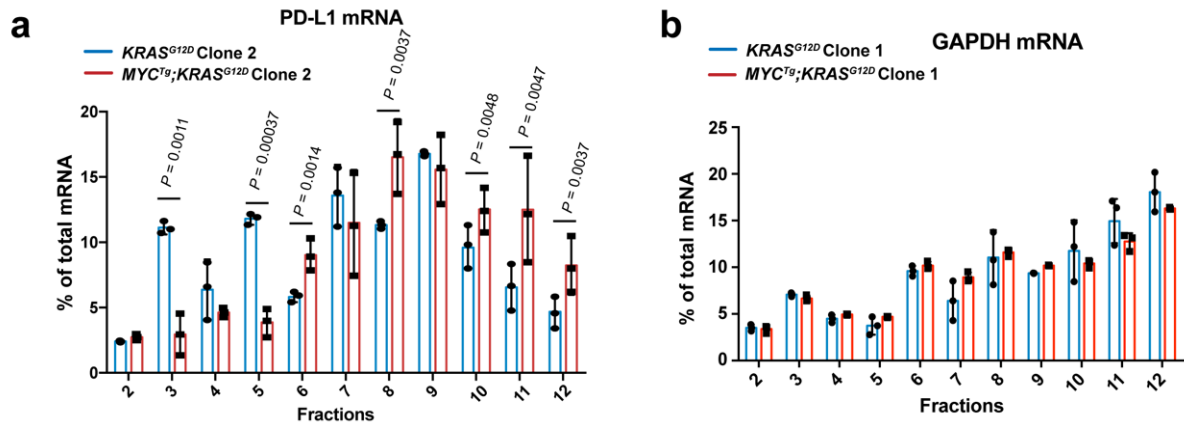

**Supplementary Figure 7 MYC in cooperation with  $KRAS^{G12D}$ , upregulates PD-L1 but not GAPDH mRNA translation.**

(a) RT-qPCR analysis of PD-L1 mRNA levels in fractions, percentages of PD-L1 mRNA distributed in each fraction against total PD-L1 mRNA, in  $MYC^{Tg};KRAS^{G12D}$  and  $KRAS^{G12D}$  HCC cells (clone 2) are shown. n=3 independent experiments, two-sided *t*-test.

(b) RT-qPCR analysis of GAPDH mRNA levels in fractions, percentages of GAPDH mRNA distributed in each fraction against total GAPDH mRNA in  $MYC^{Tg};KRAS^{G12D}$  and  $KRAS^{G12D}$  HCC cells (clone 1) are shown. n=3 independent experiments, two-sided *t*-test.

All values represent the mean  $\pm$  SD.

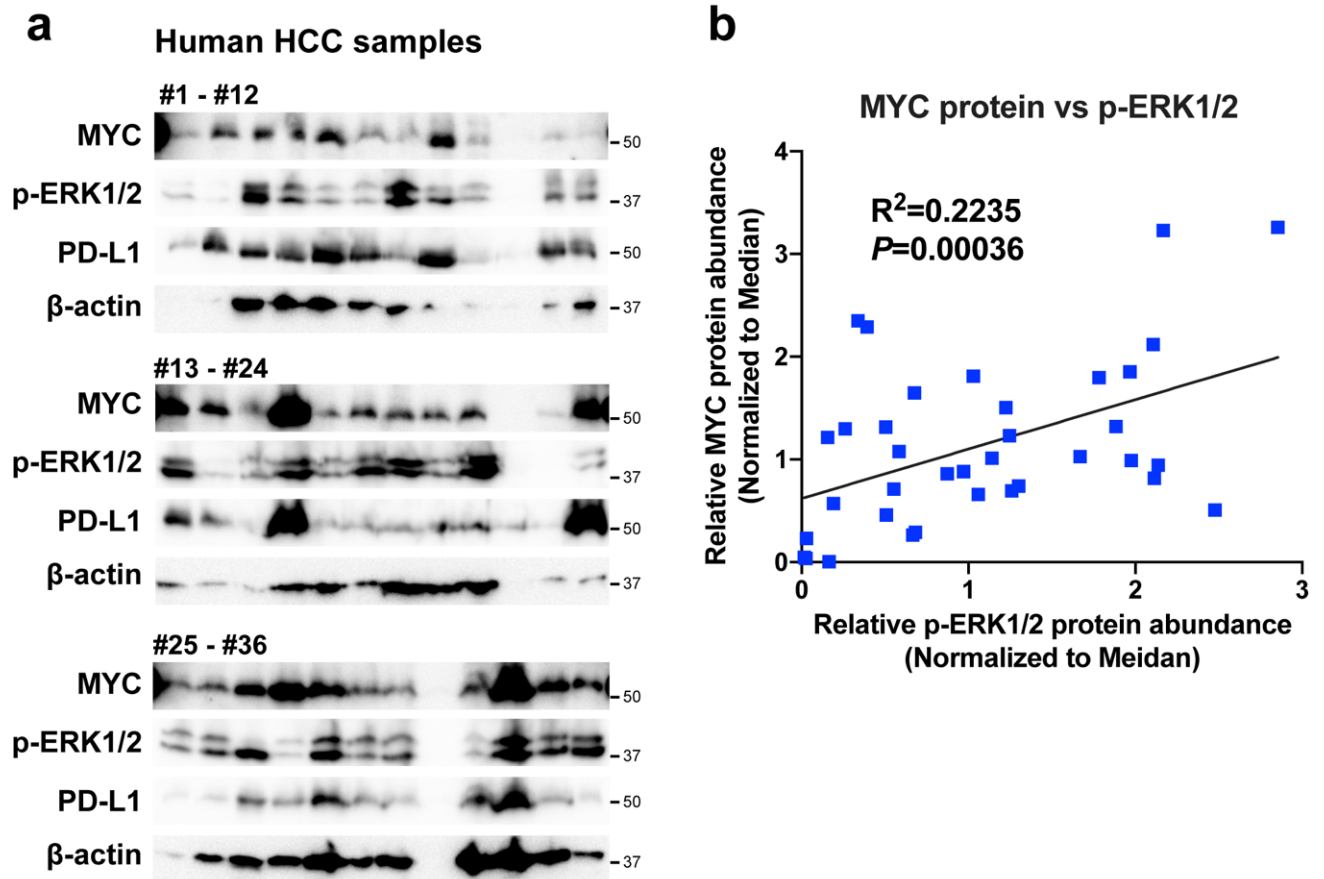

**Supplementary Figure 8 MYC protein correlates with p-ERK and PD-L1 protein abundances in human HCCs.**

(a) Representative western blot assessment of MYC, p-ERK1/2 and PD-L1 protein in 36 fresh frozen human HCC samples from n=3 independent experiments is shown.

(b) Comparison of relative MYC and p-ERK1/2 protein abundance (normalized to median) in n=36 fresh frozen human HCC patient samples from the western blot result in (a). The 95% confidence interval for the Pearson coefficients is 0.1707 to 0.6936 (Pearson's correlation test, two-sided  $P=0.0036$ ).

Uncropped blots are provided in Supplementary Figure 15.

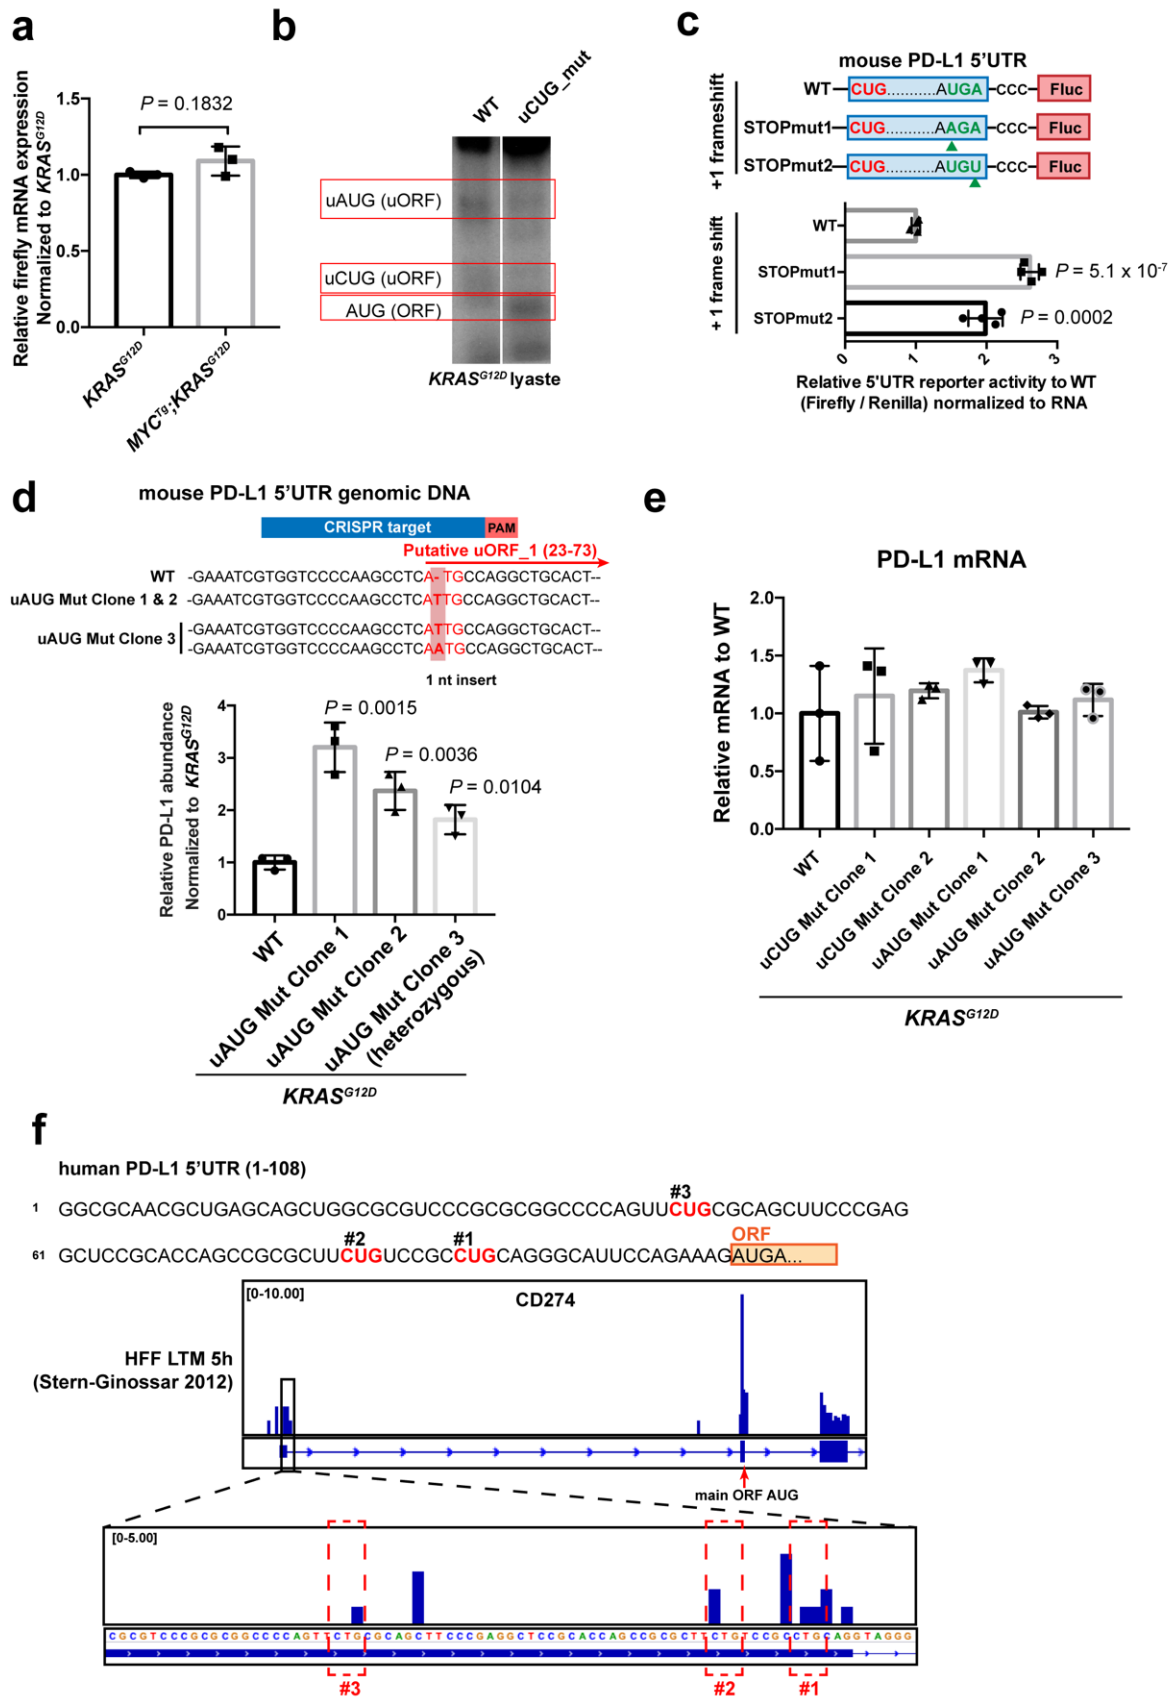

Supplementary Figure 9 uORFs within the 5' UTR of PD-L1 mRNA repress PD-L1 translation.

- (a) Relative firefly mRNA levels representing the input of mRNA template for the toeprint assay using *KRAS*<sup>G12D</sup> and *MYC*<sup>Tg</sup>; *KRAS*<sup>G12D</sup> cytoplasmic cell lysate are shown. n=3 independent experiments, two-sided *t*-test.
- (b) Autoradiography of the cDNA products from the toeprint assay using cytoplasmic lysate from *KRAS*<sup>G12D</sup> cells and mRNA containing WT PD-L1 5'UTR and PD-L1 5'UTRs with uCUG mutation. Representative figure from n=3 independent experiments is shown.
- (c) 5' UTR reporter activity of PD-L1 uORF that is in frame with the luciferase ORF, with and without stop codon mutations (A'U'GA to A'A'GA, and AUG'A' to AUG'U'), in *KRAS*<sup>G12D</sup> cells. n=4 independent experiments, two-sided *t*-test.
- (d) Up: Mouse PD-L1 5'UTR exon DNA sequence of the WT and uAUG mutation *KRAS*<sup>G12D</sup> clonal cell line are shown. PAM region is highlighted in red, CRISPR target region in blue. 1nt insertion is detected within the uAUG start codon (Clone 1 and 2 are homozygous; Clone 3 is heterozygous). Down: Relative PD-L1 abundance in WT and three mutation clonal cell lines determined by flow cytometry. n=3 independent experiments, two-sided *t*-test.
- (e) Relative PD-L1 mRNA expressions in WT and two *KRAS*<sup>G12D</sup> cell lines with uCUG or uAUG mutations were assessed by RT-qPCR. n=3 independent experiments, two-sided *t*-test.
- (f) Upper panel: The sequence of human PD-L1 5'UTR. Putative uORFs start codons- uCUGs are highlighted in red. Lower panel: Ribo-Seq plots of *CD274* in human foreskin fibroblast (HFF) treated with Lactimidomycin (LTM). Initiation ribosome footprints are detected around the uCUGs.

Data represent the mean  $\pm$  SD. Uncropped blots are provided in Supplementary Figure 15.

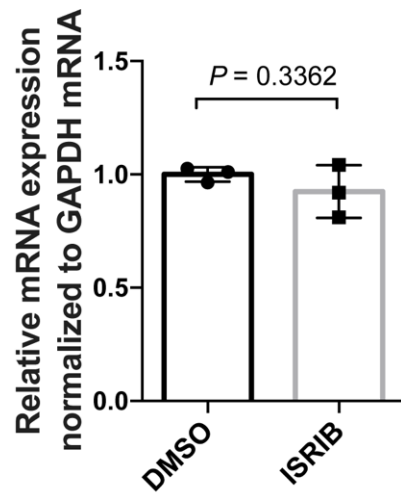

**Supplementary Figure 10 PD-L1 mRNA expression is not regulated by ISRIB.**

Relative PD-L1 mRNA expression in *MYC<sup>Tg</sup>;KRAS<sup>G12D</sup>* cell lines treated with DMSO or ISRIB for 48 hours. n=3 independent experiments, two-sided *t*-test. Data represent the mean ± SD.

**a**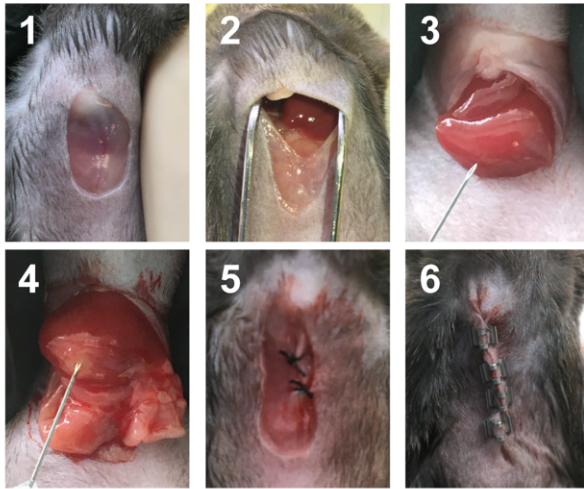**b**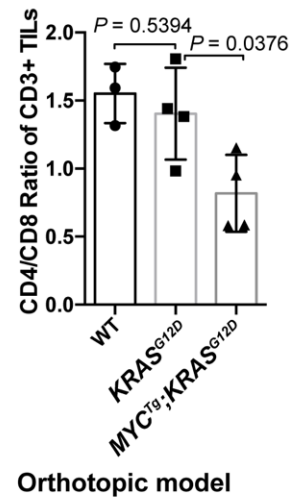**c**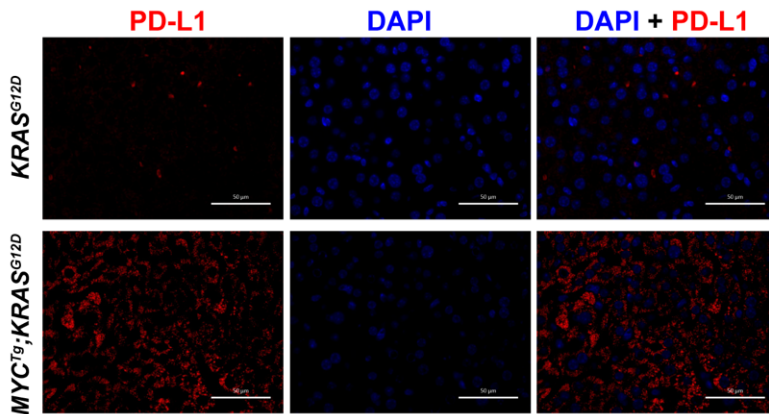**d**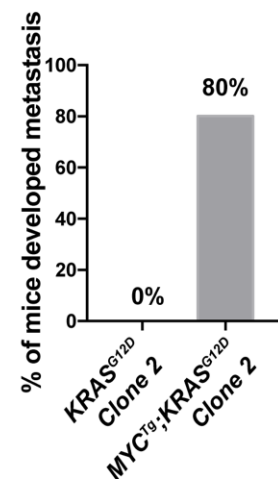

**Supplementary Figure 11 Generation and characterization of *MYC<sup>Tg</sup>;KRAS<sup>G12D</sup>* and *KRAS<sup>G12D</sup>* orthotopic mice liver cancer models.**

(a) Graphs showing the procedures of orthotopical injection of *MYC<sup>Tg</sup>;KRAS<sup>G12D</sup>* and *KRAS<sup>G12D</sup>* cells into the livers of C57/B6 mice.

(b) CD4/CD8 T-cell ratio in the livers of WT (n=3) mice and mice injected with *MYC<sup>Tg</sup>;KRAS<sup>G12D</sup>* (n=4) and *KRAS<sup>G12D</sup>* cells (n=4). Two-sided *t*-test.

(c) Representative PD-L1 and DAPI immunofluorescence staining of the livers of mice injected with *MYC<sup>Tg</sup>;KRAS<sup>G12D</sup>* and *KRAS<sup>G12D</sup>* cells from n=3 independent experiments is shown.

(d) Percentage of C57BL/6 mice injected with *KRAS<sup>G12D</sup>* clone 2 (n=5) and *MYC<sup>Tg</sup>;KRAS<sup>G12D</sup>* clone 2 (n=5) cells developed metastasis.

Data represent the mean ± SD.

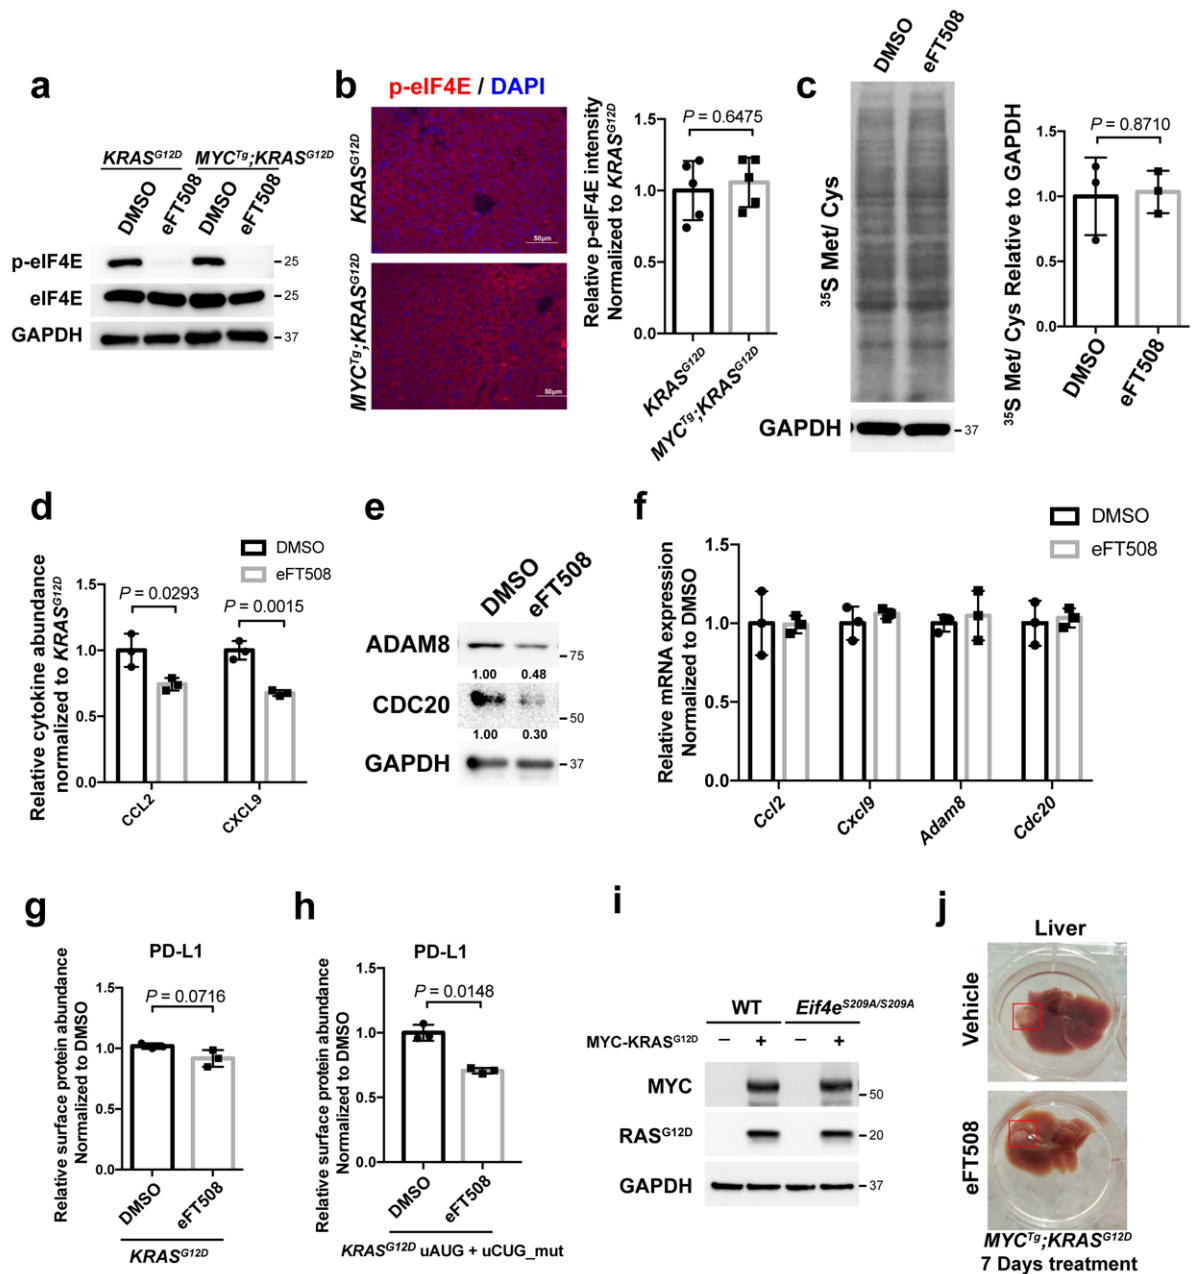

**Supplementary Figure 12 MNK1/2 inhibitor eFT508 selectively reduces PD-L1 and other protein abundance in *MYC<sup>Tg</sup>;*KRAS<sup>G12D</sup>, resulting in tumor regression.**

(a) Western blot of p-eIF4E, eIF4E and GAPDH in *KRAS<sup>G12D</sup>* and *MYC<sup>Tg</sup>;*KRAS<sup>G12D</sup> cell lines. Representative figure from n=3 independent experiments is shown.

(b) Left: representative p-eIF4E and DAPI immunofluorescence staining of the livers of mice injected with *MYC<sup>Tg</sup>;*KRAS<sup>G12D</sup> and *KRAS<sup>G12D</sup>* cells. Right: quantification of relative p-eIF4E intensity relative to the *KRAS<sup>G12D</sup>*. n=5 animals, two-sided *t*-test.

(c) Protein synthesis was measured by [<sup>35</sup>S]-methionine incorporation of newly synthesized proteins in *MYC<sup>Tg</sup>;*KRAS<sup>G12D</sup> cells treated with inhibitors of eFT508. Quantifications are shown on the right. n=3 independent experiments, two-sided *t*-test.

(d) Relative secreted CCL2 and CXCL9 abundance in *MYC<sup>Tg</sup>;*KRAS<sup>G12D</sup> cells upon 72h DMSO or eFT508 treatment were assessed by flow cytometry. n=3 independent experiments, two-sided *t*-test.

(e) ADAM8, CDC20, and GAPDH protein abundances were assessed by western blot in *MYC<sup>Tg</sup>;KRAS<sup>G12D</sup>* and *KRAS<sup>G12D</sup>* HCC cells upon 72h DMSO or eFT508 treatment. Representative figure from n=3 independent experiments is shown.

(f) Relative mRNA expressions of *Ccl2*, *Cxcl9*, *Adam8*, and *Cdc20* were assessed by RT-qPCR. n=3 independent experiments, two-sided *t*-test.

(g) Relative surface PD-L1 abundance assessed by flow cytometry in *KRAS<sup>G12D</sup>* cell lines treated with DMSO or eFT508 for 72 hours. n=3 independent experiments, two-sided *t*-test.

(h) Relative surface PD-L1 abundance assessed by flow cytometry in *KRAS<sup>G12D</sup>* cells with both uAUG and uCUG mutations (*KRAS<sup>G12D</sup>* uAUG+ uCUG\_mut) treated with DMSO or eFT508 for 72 hours. n=3 independent experiments, two-sided *t*-test.

(i) Western blot of MYC, RAS<sup>G12D</sup> and GAPDH in vector or *MYC* and *KRAS<sup>G12D</sup>* overexpressed hepatocytes of WT and *Eif4e<sup>S209A/S209A</sup>* mice. Representative figure from n=3 independent experiments is shown.

(j) Representative figures of mouse livers injected with *MYC<sup>Tg</sup>;KRAS<sup>G12D</sup>* cells for 7 days followed by 7-day Vehicle (n=10 animals) or eFT508 (n=6 animals) treatment. Red box highlights the tumors formed.

Data represent the mean ± SD. Uncropped blots are provided in Supplementary Figure 15.



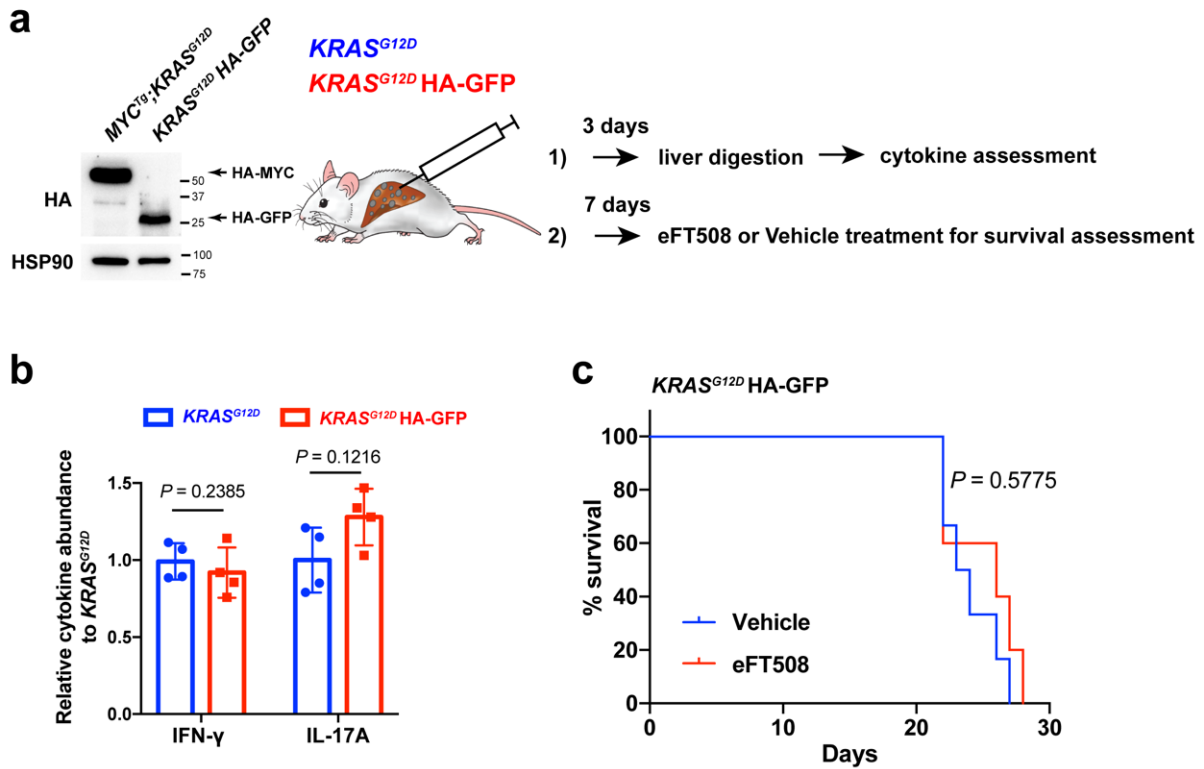

**Supplementary Figure 13 HA-tag does not induce antigen-specific Th1 response or affect the tumor sensitivity to eFT508.**

(a) Left: Representative western blot of HA and HSP90 (control) in *MYC<sup>Tg</sup>;KRAS<sup>G12D</sup>* and *KRAS<sup>G12D</sup>* cells stably overexpressing HA-tagged GFP from 3 independent experiments. The HA level overexpressed in *KRAS<sup>G12D</sup>* cells is comparable to that in *MYC<sup>Tg</sup>;KRAS<sup>G12D</sup>* cells. Right: *KRAS<sup>G12D</sup>* and *KRAS<sup>G12D</sup>* cells stably overexpressing HA-tagged GFP were injected into the liver of C57/BL6 mice with indicated follow-up assays and treatments.

(b) IFN-γ and IL-17A abundance in the liver of mice injected with *KRAS<sup>G12D</sup>* cells and *KRAS<sup>G12D</sup>* cells stably overexpressing HA-tagged GFP were assessed by flow cytometry. n=4 animals, two-sided *t*-test. Data represent the mean ± SD.

(c) Kaplan–Meier curves showing the survival of male C57/B6 mice with *KRAS<sup>G12D</sup>* HA-GFP cells orthotopically injected into the livers. Vehicle (n=6 animals) or eFT508 (10 mg/kg) (n=5 animals) was orally administered once a day starting 7-day post-tumor implantation. Wilcoxon rank sum test.

Uncropped blots are provided in Supplementary Figure 15.

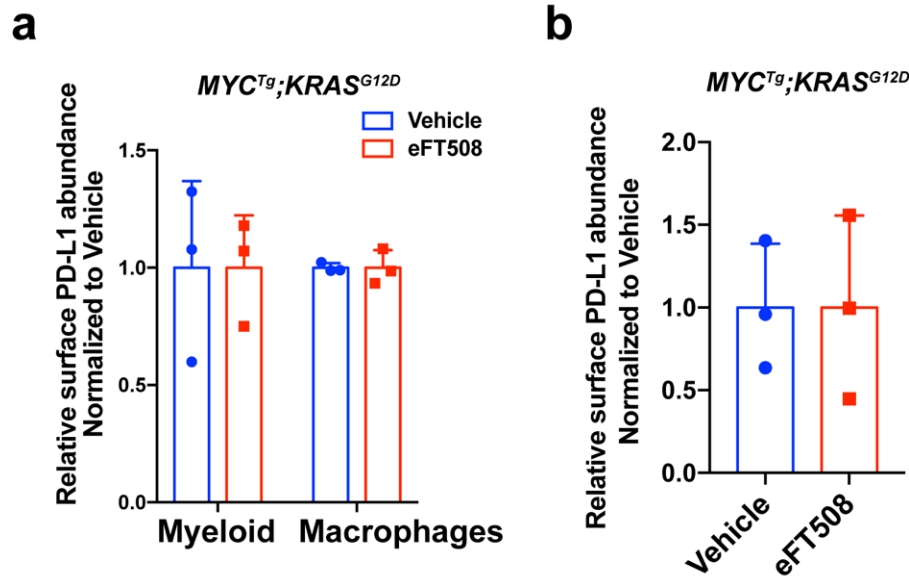

**Supplementary Figure 14 eFT508 has limited effect on reducing PD-L1 protein abundance in tumor-infiltrated immune cells.**

Male C57/B6 mice with *MYC<sup>Tg</sup>;KRAS<sup>G12D</sup>* cells orthotopically injected into the livers. Vehicle (n=3 animals) or eFT508 (10 mg/kg) (n=3 animals) was orally administered once a day starting 7 days post-tumor implantation. (a) Relative surface PD-L1 abundance assessed by flow cytometry on tumor infiltrated myeloid cells and liver-resident macrophages with vehicle or eFT508 treatment. Two-sided *t*-test.

(b) Relative surface PD-L1 abundance on isolated T lymphocytes from the mice livers injected with *MYC<sup>Tg</sup>;KRAS<sup>G12D</sup>* cells followed by 7-day vehicle (n=3 animals) or eFT508 (n=3 animals) treatment were assessed by flow cytometry. Two-sided *t*-test.

Data represent the mean ± SD.

**Supplementary Figure 15 Uncropped immunoblot pictures.**

**Figure 3b**

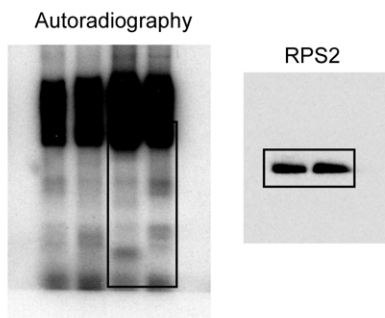

**Figure 3f**

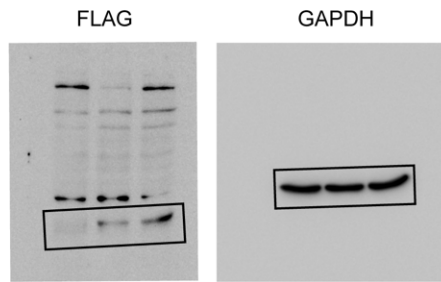

**Figure 3i**

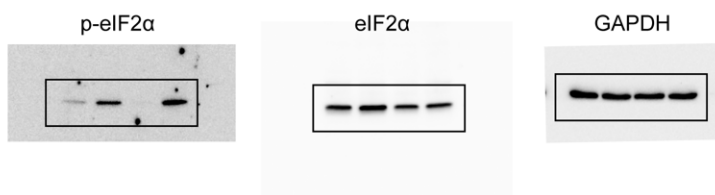

**Supplementary Figure 1b**

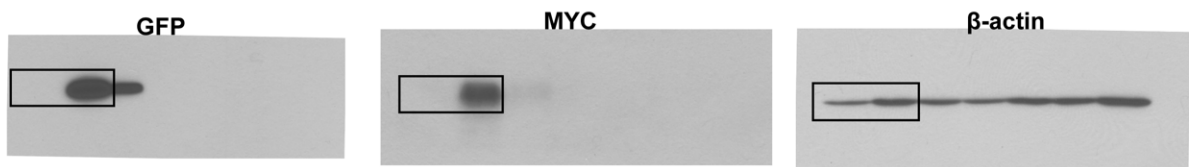

**Supplementary Figure 5c**

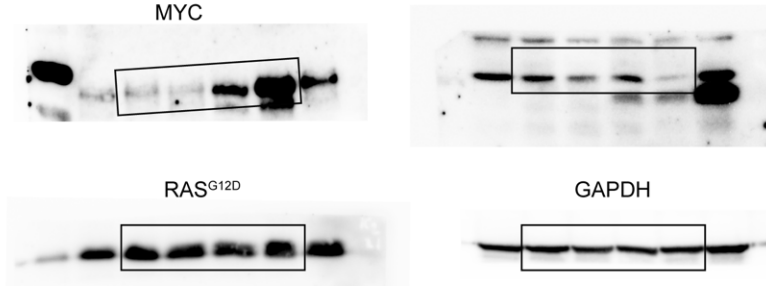

**Supplementary Figure 5g**

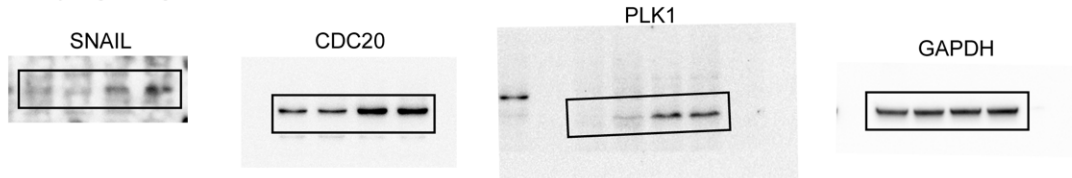

Supplementary Figure 15 Uncropped immunoblot pictures.

Supplementary Figure 7a

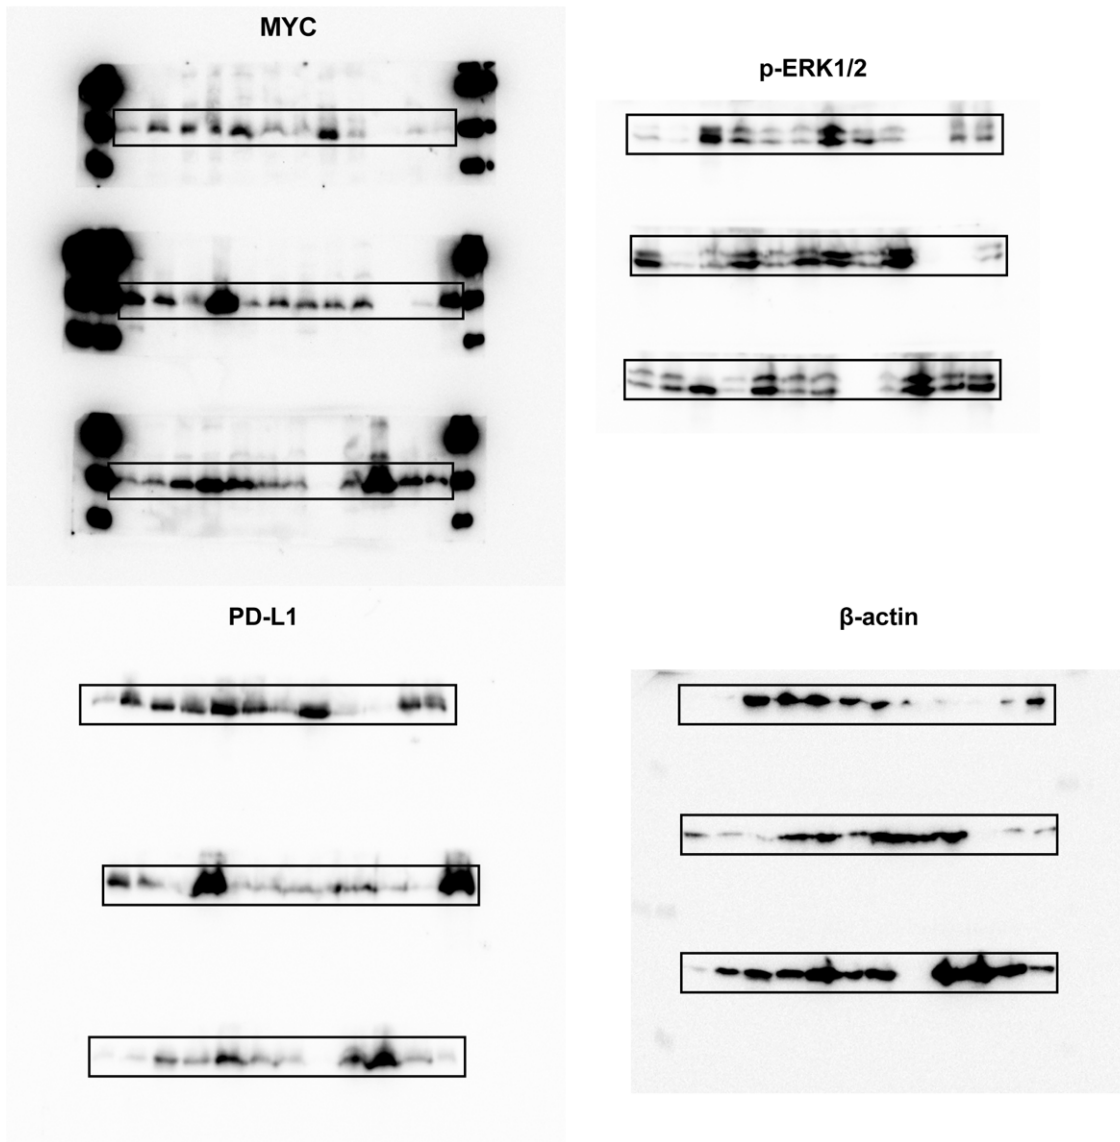

Supplementary Figure 8b

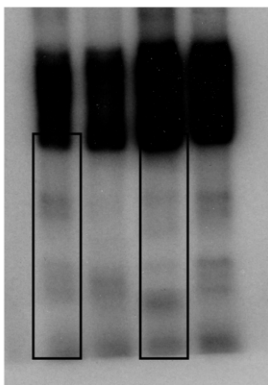

**Supplementary Figure 15 Uncropped immunoblot pictures.**

**Supplementary Figure 11a**

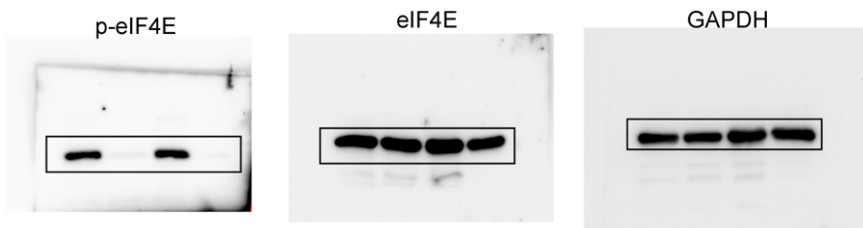

**Supplementary Figure 11c**

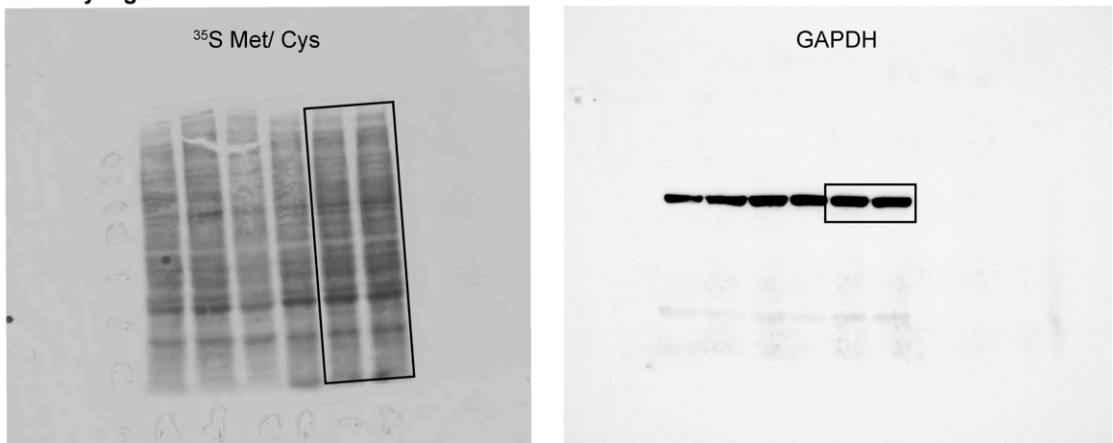

**Supplementary Figure 11e**

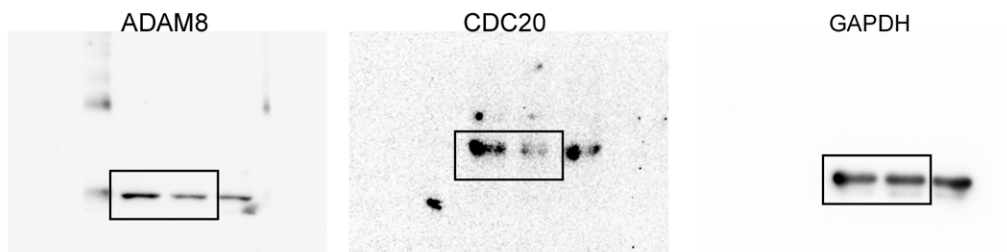

**Supplementary Figure 11i**

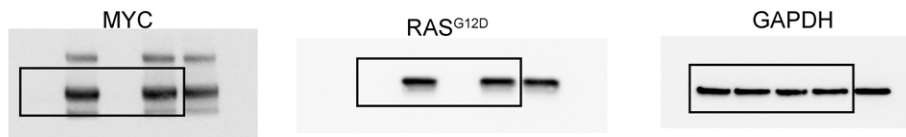

**Supplementary Figure 12a**

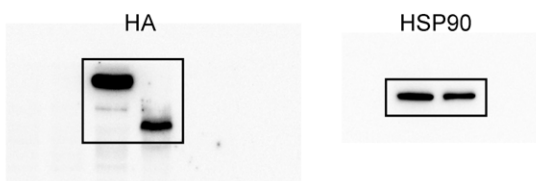

Supplement: NIHMS1008848-supplement-Figures.pdf [file NIHMS1008848-supplement-Figures.pdf]
